# Supplementary material for: Antiviral Properties of Pennisetum purpureum Extract against Coronaviruses and Enteroviruses
Source: MDPI journal article supplement (doi:10.3390/pathogens11111371), 2022-11-17
Supplement: s1 [file s1]

## Supplementary Materials

Table S1 shows the Antiviral effect of *Pennisetum purpureum* extract (Heyiya®) against enterovirus 71 (EV71), feline coronavirus (FCoV), and porcine epidemic diarrhea virus. Virus titers (TCID<sub>50</sub>/100μL) of the viruses pretreated with 10-fold serial dilutions of the extract for 1 hour (1h) and 6 hours (6h) were determined by TCID<sub>50</sub> assay. The viruses without pretreatment of the extract were used as the positive control (EV71, FCoV, PEDV). Relative TCID<sub>50</sub>/100μL to control was calculated as follow:  $\log_{10}(\text{TCID}_{50}/100\mu\text{L of the virus without pretreatment of the extract}) - \log_{10}(\text{TCID}_{50}/100\mu\text{L of the virus pretreated with the extract})$ ,

**Table S1.** Virus titers (TCID<sub>50</sub>/100μL) of the viruses without pretreatment (EV71, FCoV, PEDV) or the viruses pretreated with 10-fold serial dilutions of the *Pennisetum purpureum* extract (Heyiya®) for 1 hour and 6 hours

| Groups                   | Log <sub>10</sub> TCID <sub>50</sub> /100μL |      |      |         |       |                     |
|--------------------------|---------------------------------------------|------|------|---------|-------|---------------------|
|                          | R1                                          | R2   | R3   | Average | STEDV | Relative to control |
| EV71, 1h                 | 10                                          | 10   | 10   | 10      | 0     |                     |
| EV71, 6h                 | 8                                           | 8.5  | 10   | 9.54    | 1.04  |                     |
| EV71+1/100 Heyiya®, 1h   | 10                                          | 9    | 10   | 9.85    | 0.58  | -0.15               |
| EV71+1/100 Heyiya®, 6h   | 7                                           | 6.4  | 5.8  | 6.64    | 0.6   | -3.36               |
| EV71+1/1000 Heyiya®, 1h  | 10                                          | 7.25 | 10   | 9.82    | 1.59  | -0.18               |
| EV71+1/1000 Heyiya®, 6h  | 7.25                                        | 6.67 | 10   | 9.52    | 1.78  | -0.48               |
| EV71+1/10000 Heyiya®, 1h | 9.5                                         | 7.25 | 9    | 9.14    | 1.18  | -0.86               |
| EV71+1/10000 Heyiya®, 6h | 10                                          | 7.5  | 8    | 9.53    | 1.32  | -0.47               |
| FCoV, 1h                 | 4                                           | 3.57 | 3.8  | 3.79    | 0.22  |                     |
| FCoV, 6h                 | 3.67                                        | 3.67 | 3.67 | 3.67    | 0     |                     |
| FCoV+1/10 Heyiya®, 1h    | 5                                           | 4.25 | 3.8  | 4.62    | 0.61  | +0.83               |
| FCoV+1/10 Heyiya®, 6h    | 2.5                                         | 2.57 | 2.8  | 2.57    | 0.19  | -1.22               |
| FCoV+1/100 Heyiya®, 1h   | 3.57                                        | 4.4  | 4.5  | 4.3     | 0.51  | +0.51               |
| FCoV+1/100 Heyiya®, 6h   | 3                                           | 3    | 2.67 | 2.92    | 0.51  | -0.75               |
| FCoV+1/1000 Heyiya®, 1h  | 5.25                                        | 4.5  | 4    | 4.86    | 0.63  | +1.07               |
| FCoV+1/1000 Heyiya®, 6h  | 4.5                                         | 3.8  | 3.5  | 4.17    | 0.51  | +0.38               |
| PEDV, 1h                 | 3.5                                         | 3.8  |      | 3.68    | 0.21  |                     |
| PEDV, 6h                 | 2.33                                        | 2.5  |      | 2.42    | 0.12  |                     |
| PEDV+1/10 Heyiya®, 1h    | 2                                           | 1.8  |      | 1.91    | 0.14  | -1.77               |
| PEDV+1/10 Heyiya®, 6h    | 0                                           | 0    |      | 0       | 0     | -3.68               |
| PEDV+1/100 Heyiya®, 1h   | 3.25                                        | 4.33 |      | 4.06    | 0.76  | +0.38               |
| PEDV+1/100 Heyiya®, 6h   | 2.67                                        | 3    |      | 2.87    | 0.23  | -0.81               |
| PEDV+1/1000 Heyiya®, 1h  | 3.42                                        | 3.5  |      | 3.46    | 0.06  | -0.22               |
| PEDV+1/1000 Heyiya®, 6h  | 2.5                                         | 2.57 |      | 2.54    | 0.05  | -1.14               |

**Table S2.** The body length (cm) of chicken embryo inoculated with infectious bronchitis virus (IBV) without the pretreatment of *Pennisetum purpureum* extract (Heyiya®), or with IBV pretreated with 10-fold or 100-fold diluted extract for 1h or 6h at room temperature, or without IBV (NC)

|                       | Embryo body length (cm) |     |     |     |     |         |       |
|-----------------------|-------------------------|-----|-----|-----|-----|---------|-------|
|                       | R1                      | R2  | R3  | R4  | R5  | Average | STEDV |
| IBV                   | 5.5                     | 4   | 4.5 |     |     | 4.67    | 0.76  |
| IBV+1/10 Heyiya®, 6h  | 6.6                     | 6.6 | 6.5 | 5.1 | 6.1 | 6.18    | 0.64  |
| IBV+1/10 Heyiya®, 1h  | 4.6                     | 4.3 | 6.1 |     |     | 5       | 0.96  |
| IBV+1/100 Heyiya®, 6h | 5                       | 5.5 | 5.7 | 5   | 5   | 5.24    | 0.34  |
| IBV+1/100 Heyiya®, 1h | 5.2                     | 5.2 | 5.7 | 4.3 | 5.4 | 5.16    | 0.52  |
| NC (without IBV)      | 7                       | 7   | 7   |     |     | 7       | 0     |
